# Supplementary material for: On the use of a 2D-carbon microfiber fractionation system to improve flow-injection QTOF-HRMS analysis in complex matrices: the case of Abelmoschus manihot flower extracts
Source: Royal Society of Chemistry journal article supplement (doi:10.1039/d1an02130c), 2022-01-01
Supplement: d1an02130c1.pdf [file d1an02130c1.pdf]

1                   **Electronic Supplementary Information**

2

3   **On the use of a 2D-carbon microfiber fractionation system to**  
4 **improve flow-injection QTOF-HRMS analysis in complex**  
5 **matrices: the case of *Abelmoschus manihot* flower extracts**

6

7 Chol-San Jon, <sup>a,§</sup> Lei Yang, <sup>a,§</sup> Zhao Wang, <sup>b</sup> Meiyu Cui, <sup>b</sup> Huaze Sun, <sup>b</sup> Liyuan Wang, <sup>b</sup>

8 Lu Liu, <sup>b</sup> Donatella Nardiello, <sup>c</sup> Maurizio Quinto, <sup>a,c</sup> Miao He, <sup>a,#</sup> Donghao Li\*<sup>a,b</sup>

9

10 <sup>a</sup> Interdisciplinary Program of Biological Functional Molecules, College of Integration  
11 Science, Yanbian University, Park Road 977, Yanji City, Jilin Province, 133002, PR  
12 China.

13 <sup>b</sup> Department of Chemistry, Yanbian University, Park Road 977, Yanji City, Jilin  
14 Province, 133002, PR China.

15 <sup>c</sup> Department of Agriculture, Food, Natural resource, and Engineering (DAFNE), via  
16 Napoli 25, I-71122 Foggia, Italy.

17 §: Chol-San Jon and Lei Yang contributed equally.

18

19 \*Corresponding author

20 E-mail: dhli@ybu.edu.cn

21 Tel.: +86-0433-2436456

22 Fax: +86-0433-2732456

23 \*#Co-Corresponding author

24 E-mail: hemiao@ybu.edu.cn

25 Tel.: +86-0433-2436456

26 Fax: +86-0433-2732456

28 **Part1 Fig. S1-S6:** 2D $\mu$ CFs-QTOF-MS/MS spectra of the six predicted

29 compounds. (S3-S5)

30

31 **Part2 Fig. S7-S13:** Extracted ion chromatograms (EIC) of the seven

32 co-elution compounds by HPLC-MS. (S6-S8)

33

34 **Part3 Table S1:** List of investigated compounds obtained by the

35 2D $\mu$ CFs-QTOF-MS/MS from *A. manihot* flower extracts. (S9-S10)

36

37 **Part4 Table S2:** Putative identification of chemical constituents of *A.*

38 *manihot* flower extracts by using HPLC-MS/MS in positive ion mode.

39 (S11-S12)

40

41 **Part5 References:** S13- S14

42

43 **Part1: 2D $\mu$ CFs-QTOF-MS/MS spectra of the six predicted**

44 **compounds. (Fig. S1-S6)**

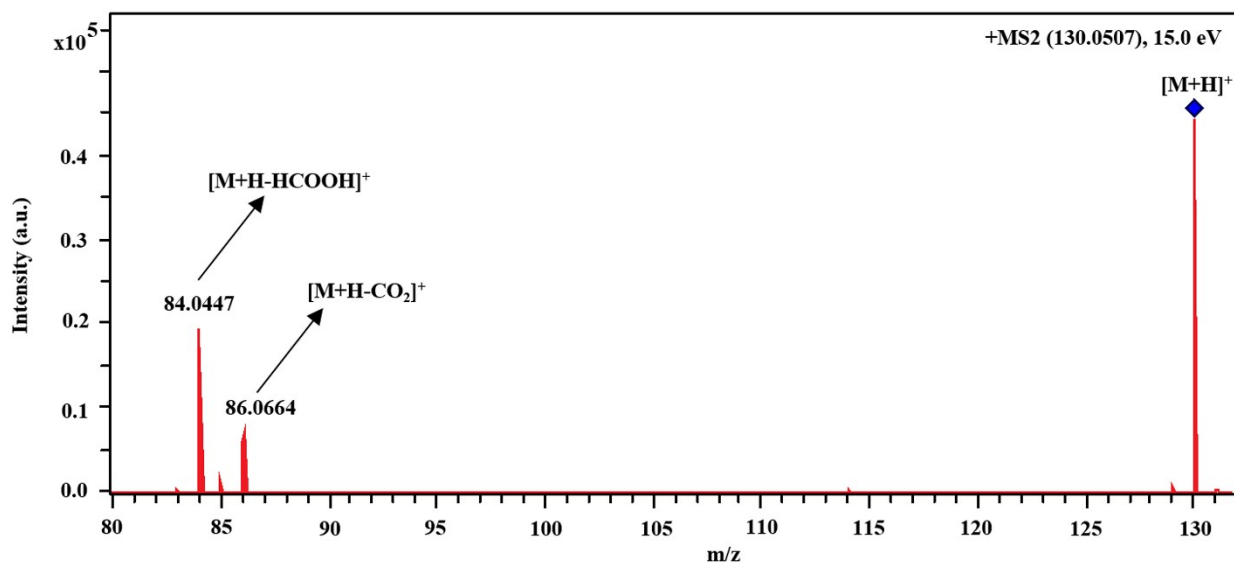

45 Fig. S1 Fragmentation results for m/z 130.0507 by 2D $\mu$ CFs-QTOF-MS/MS in positive ion mode.

46

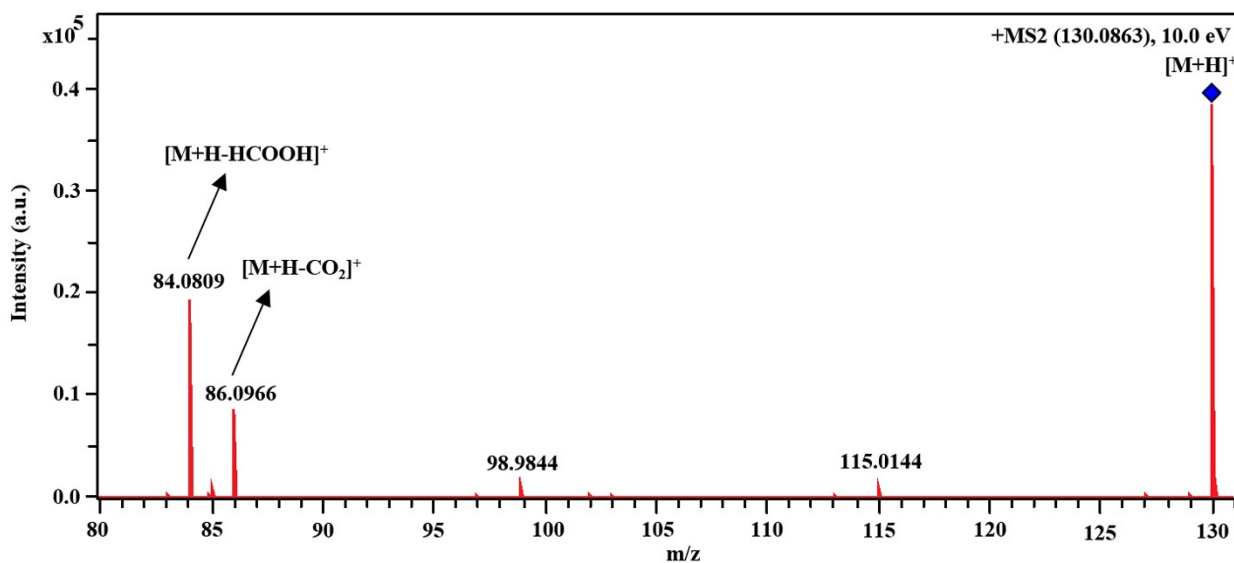

47 Fig. S2 Fragmentation results for m/z 130.0863 by 2D $\mu$ CFs-QTOF-MS/MS in positive ion mode.

48

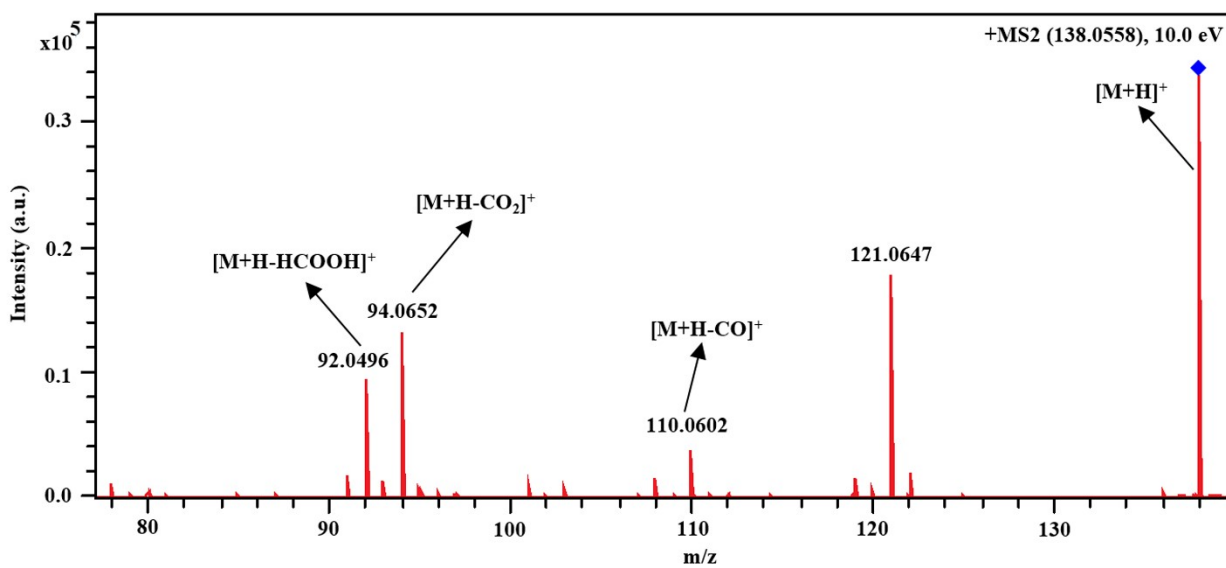

49 Fig. S3 Fragmentation results for  $m/z$  138.0558 by 2D $\mu$ CFs-QTOF-MS/MS in positive ion mode.

50

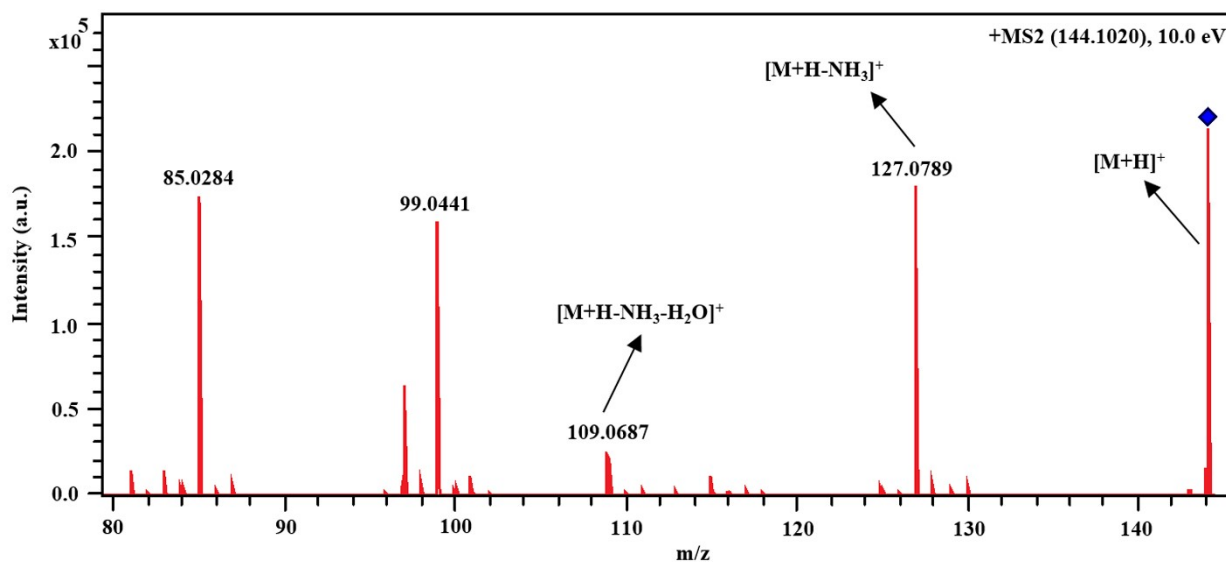

51 Fig. S4 Fragmentation results for  $m/z$  144.1020 by 2D $\mu$ CFs-QTOF-MS/MS in positive ion mode.

52

53

54

55

56

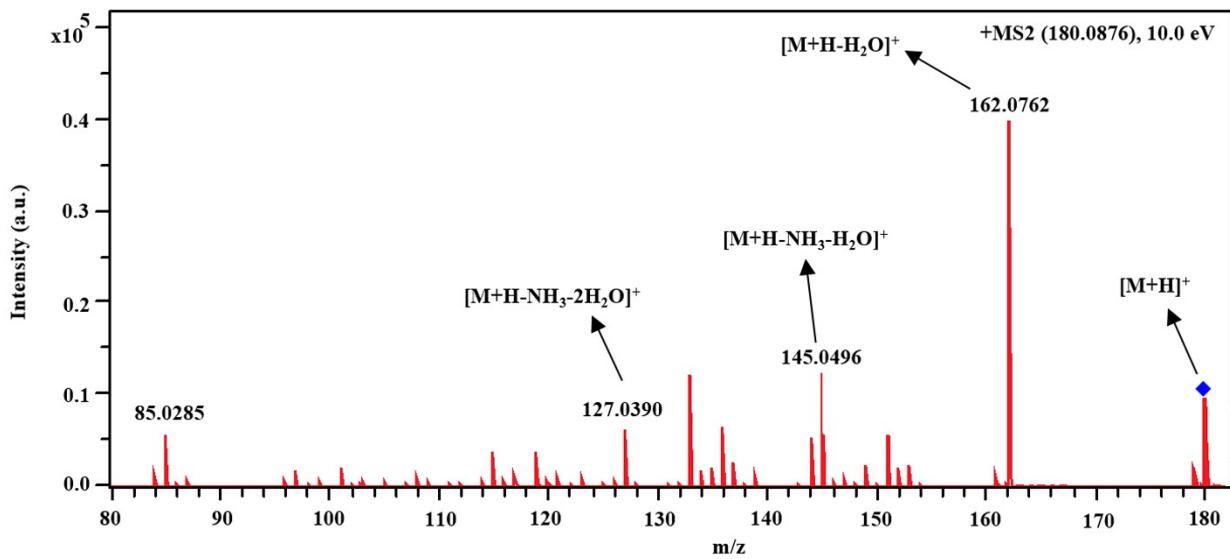

57 Fig. S5 Fragmentation results for  $m/z$  180.0876 by 2D $\mu$ CFs-QTOF-MS/MS in positive ion mode.

58

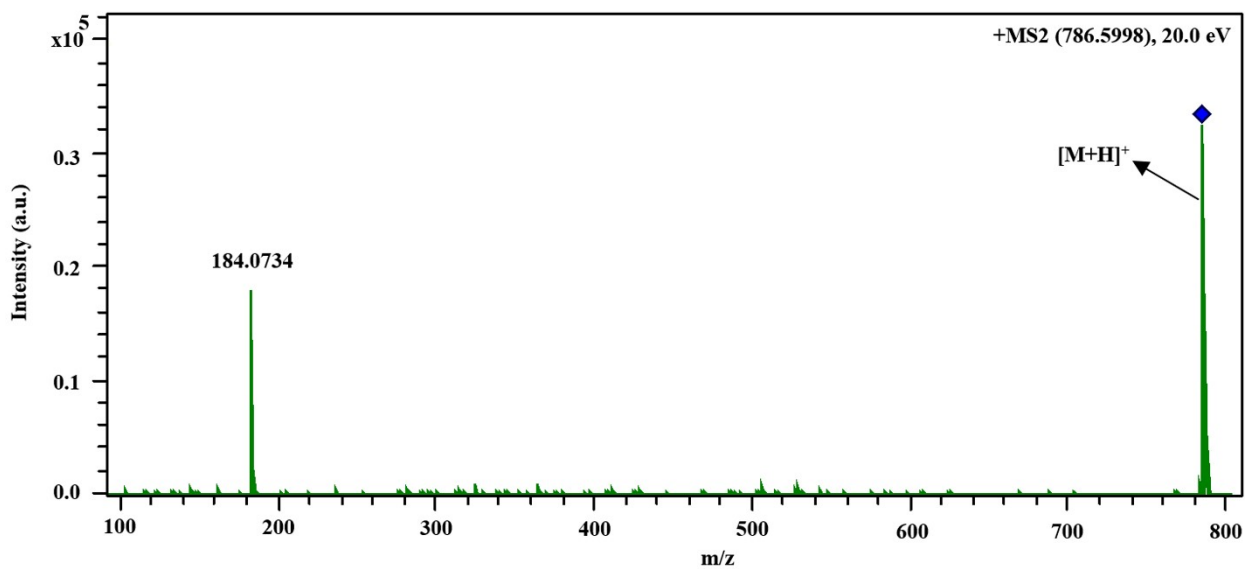

59 Fig. S6 Fragmentation results for  $m/z$  786.5998 by 2D $\mu$ CFs-QTOF-MS/MS in positive ion mode.

60

61

62

63

64

65 **Part2: Extracted ion chromatograms (EIC) of the seven co-elution**  
66 **compounds. (Fig. S7-S13)**

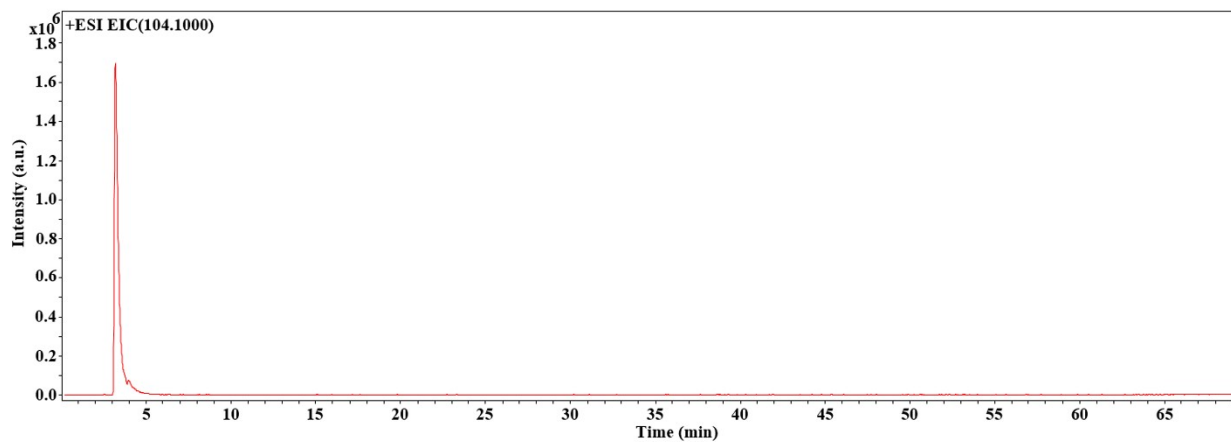

67 Fig. S7 Extraction of ion chromatogram (EIC) of m/z 104.1 by HPLC-MS in positive ion mode.

68

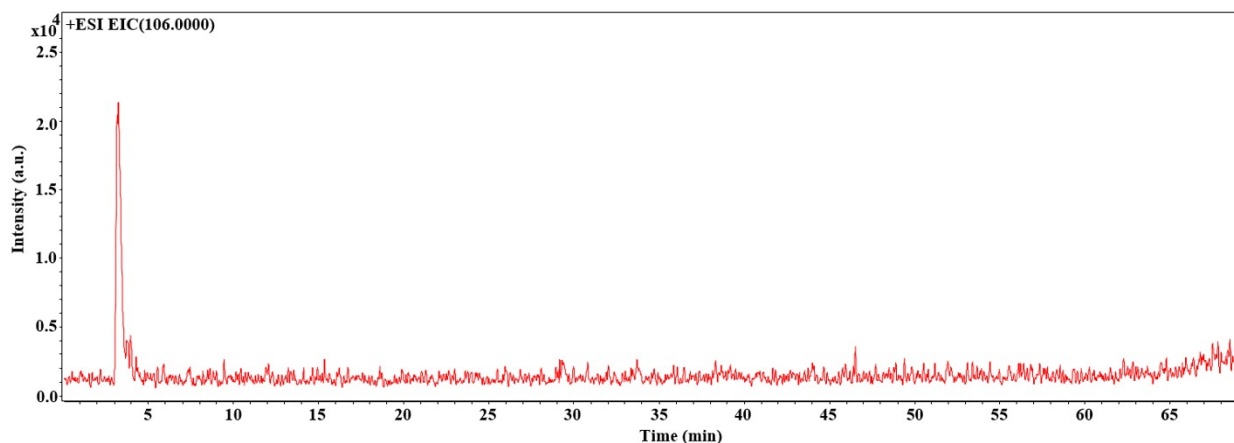

69 Fig. S8 Extraction of ion chromatogram (EIC) of m/z 106.0 by HPLC-MS in positive ion mode.

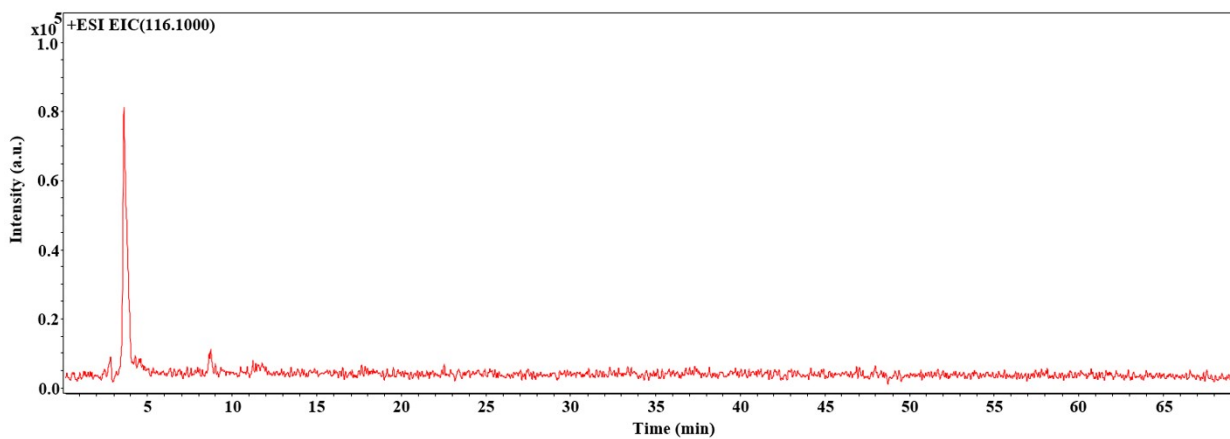

70

71 Fig. S9 Extraction of ion chromatogram (EIC) of m/z 116.1 by HPLC-MS in positive ion mode.

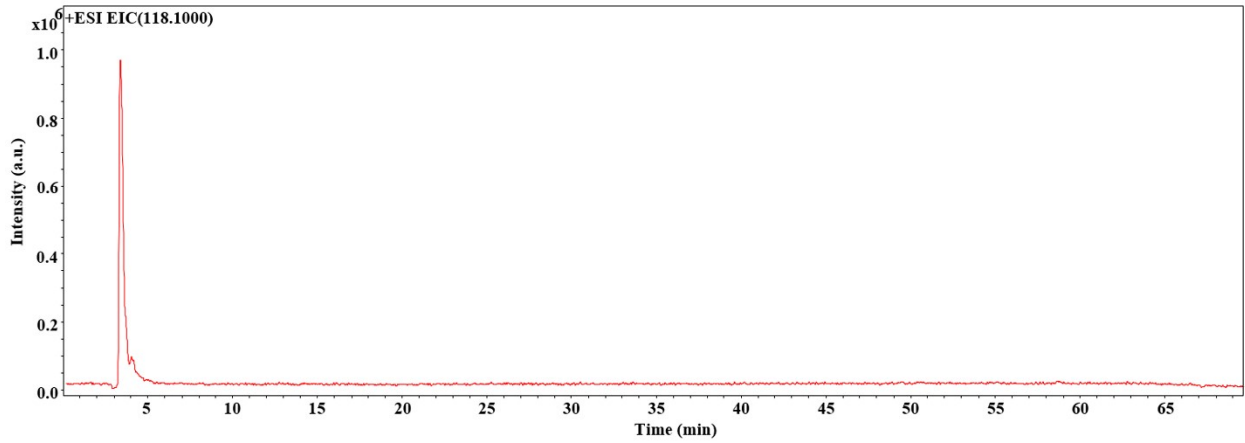

72 Fig. S10 Extraction of ion chromatogram (EIC) of m/z 118.1 by HPLC-MS in positive ion mode.

73

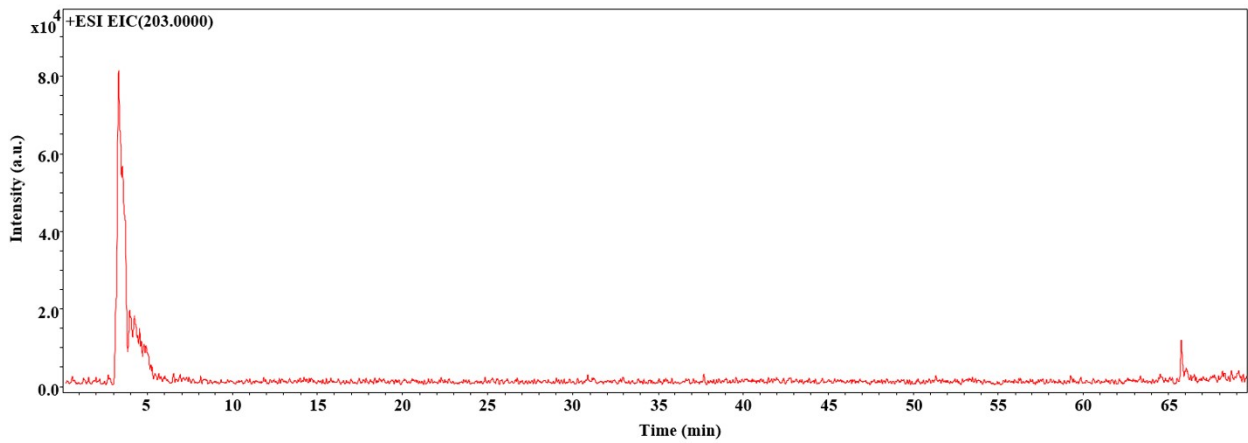

74 Fig. S11 Extraction of ion chromatogram (EIC) of m/z 203.0 by HPLC-MS in positive ion mode.

75

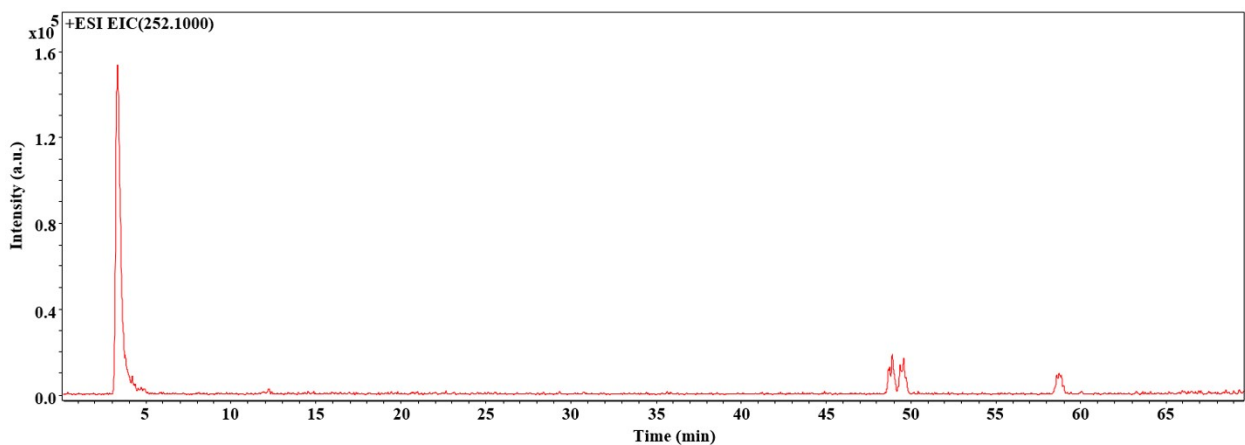

76 Fig. S12 Extraction of ion chromatogram (EIC) of m/z 252.1 by HPLC-MS in positive ion mode.

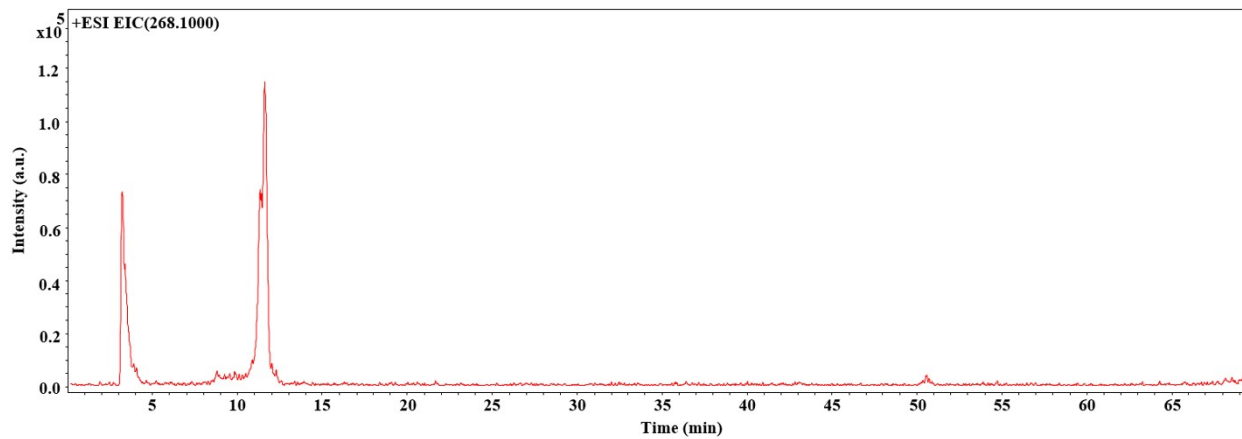

77 Fig. S13 Extraction of ion chromatogram (EIC) of  $m/z$  268.1 by HPLC-MS in positive ion mode.



78 **Part3:**79 **Table S1** List of investigated compounds obtained by the 2D $\mu$ CFs-QTOF-MS/MS from *A. manihot* flower extracts.

| Peak NO. | Fraction   | Compound                                 | Formula                                                       | Adduct              | Calculated mass (Da) | Observed mass (Da) | Score | Err [ppm] | Fragment ions (m/z)                                        | Ref |
|----------|------------|------------------------------------------|---------------------------------------------------------------|---------------------|----------------------|--------------------|-------|-----------|------------------------------------------------------------|-----|
| 1        | High-polar | $\gamma$ -Aminobutyric acid              | C <sub>4</sub> H <sub>9</sub> NO <sub>2</sub>                 | [M+H] <sup>+</sup>  | 104.0706             | 104.0714           | 100   | -7.7      | 87.0444; 86.0604                                           | 1   |
| 2        |            | Serine                                   | C <sub>3</sub> H <sub>7</sub> NO <sub>3</sub>                 | [M+H] <sup>+</sup>  | 106.0499             | 106.0506           | 100   | -6.6      | 88.0398                                                    | 1   |
| 3        |            | Proline                                  | C <sub>5</sub> H <sub>9</sub> NO <sub>2</sub>                 | [M+H] <sup>+</sup>  | 116.0706             | 116.0714           | 100   | -6.8      | 70.0663                                                    | 1   |
| 4        |            | Valine                                   | C <sub>5</sub> H <sub>11</sub> NO <sub>2</sub>                | [M+H] <sup>+</sup>  | 118.0863             | 118.0871           | 100   | -6.7      | 72.0809                                                    | 1   |
| 7        |            | Isoleucine/Leucine*                      | C <sub>6</sub> H <sub>13</sub> NO <sub>2</sub>                | [M+H] <sup>+</sup>  | 132.1019             | 132.1027           | 100   | -6.0      | 86.0965                                                    | 1   |
| 8        |            | Aspartic acid                            | C <sub>4</sub> H <sub>7</sub> NO <sub>4</sub>                 | [M+H] <sup>+</sup>  | 134.0448             | 134.0459           | 100   | -8.2      | 88.0394; 116.0341                                          | 1   |
| 9        |            | Adenine                                  | C <sub>5</sub> H <sub>5</sub> N <sub>5</sub>                  | [M+H] <sup>+</sup>  | 136.0627             | 136.0633           | 100   | -4.4      | 119.0346                                                   | 2   |
| 11       |            | 5-(hydroxymethyl)-2-furancarboxylic acid | C <sub>6</sub> H <sub>6</sub> O <sub>4</sub>                  | [M+H] <sup>+</sup>  | 143.0339             | 143.0345           | 100   | -4.2      |                                                            | 3   |
| 13       |            | Glutamine                                | C <sub>5</sub> H <sub>10</sub> N <sub>2</sub> O <sub>3</sub>  | [M+H] <sup>+</sup>  | 147.0764             | 147.0773           | 100   | -6.1      | 84.0445                                                    | 4   |
| 14       |            | Lysine                                   | C <sub>6</sub> H <sub>14</sub> N <sub>2</sub> O <sub>2</sub>  | [M+H] <sup>+</sup>  | 147.1128             | 147.1131           | 100   | -2.0      | 84.0820; 130.0875                                          | 1   |
| 15       |            | Glutamate                                | C <sub>5</sub> H <sub>9</sub> NO <sub>4</sub>                 | [M+H] <sup>+</sup>  | 148.0604             | 148.0613           | 100   | -6.0      | 84.0446; 130.0501; 102.0548                                | 1   |
| 16       |            | Guanine                                  | C <sub>5</sub> H <sub>5</sub> N <sub>5</sub> O                | [M+H] <sup>+</sup>  | 152.0566             | 152.0572           | 100   | -3.9      | 93.0092                                                    | 2   |
| 17       |            | Phenylalanine                            | C <sub>9</sub> H <sub>11</sub> NO <sub>2</sub>                | [M+H] <sup>+</sup>  | 166.0863             | 166.0871           | 100   | -4.8      | 120.0808                                                   | 3   |
| 19       |            | Tyrosine                                 | C <sub>9</sub> H <sub>11</sub> NO <sub>3</sub>                | [M+H] <sup>+</sup>  | 182.0812             | 182.0820           | 100   | -4.3      | 136.0762; 123.0445                                         | 1   |
| 20       |            | Galactose/Glucose/Mannose*               | C <sub>6</sub> H <sub>12</sub> O <sub>6</sub>                 | [M+Na] <sup>+</sup> | 203.0526             | 203.0536           | 100   | -4.9      |                                                            | 5   |
| 21       |            | Tryptophan                               | C <sub>11</sub> H <sub>12</sub> N <sub>2</sub> O <sub>2</sub> | [M+H] <sup>+</sup>  | 205.0972             | 205.0986           | 100   | -6.8      | 146.0610; 188.0715                                         | 1   |
| 22       |            | Unknown H1                               | C <sub>11</sub> H <sub>6</sub> O <sub>5</sub>                 | [M+H] <sup>+</sup>  | 219.0288             | 219.0275           | 100   | 5.9       | 202.0710; 197.0286                                         |     |
| 23       |            | Cytidine                                 | C <sub>9</sub> H <sub>13</sub> N <sub>3</sub> O <sub>5</sub>  | [M+H] <sup>+</sup>  | 244.0928             | 244.0927           | 100   | 0.4       | 112.0508                                                   | 2   |
| 24       |            | 2'-Deoxyadenosine                        | C <sub>10</sub> H <sub>13</sub> N <sub>5</sub> O <sub>3</sub> | [M+H] <sup>+</sup>  | 252.1091             | 252.1088           | 100   | 1.1       | 99.0443; 136.0624; 117.0545                                | 2   |
| 25       |            | Adenosine/2'-Deoxyguanosine*             | C <sub>10</sub> H <sub>13</sub> N <sub>5</sub> O <sub>4</sub> | [M+H] <sup>+</sup>  | 268.1040             | 268.1047           | 100   | -2.6      | 136.0621; 117.0548                                         | 3   |
| 26       |            | Unknown H2                               | C <sub>12</sub> H <sub>16</sub> N <sub>6</sub> O <sub>4</sub> | [M+H] <sup>+</sup>  | 309.1306             | 309.1303           | 100   | 0.9       | 291.1189; 273.1083; 225.0872; 292.1030; 292.1217; 130.0862 |     |
| 27       |            | Unknown H3                               | C <sub>17</sub> H <sub>16</sub> O <sub>10</sub>               | [M+H] <sup>+</sup>  | 381.0816             | 381.0804           | 100   | 3.1       | 203.0527; 364.1238; 290.0762;                              |     |

|    |                                    |                                                                            |                                                              |                    |          |          |      |                                                                  |                                                                  |   |
|----|------------------------------------|----------------------------------------------------------------------------|--------------------------------------------------------------|--------------------|----------|----------|------|------------------------------------------------------------------|------------------------------------------------------------------|---|
|    |                                    |                                                                            |                                                              |                    |          |          |      |                                                                  | 219.0266; 201.0162; 274.0924                                     |   |
| 28 | Medium-polar                       | Uridine                                                                    | C <sub>9</sub> H <sub>12</sub> N <sub>2</sub> O <sub>6</sub> | [M+H] <sup>+</sup> | 245.0768 | 245.0780 | 100  | -4.8                                                             | 113.0346                                                         | 6 |
| 29 |                                    | Quercetin                                                                  | C <sub>15</sub> H <sub>10</sub> O <sub>7</sub>               | [M+H] <sup>+</sup> | 303.0499 | 303.0513 | 100  | -4.6                                                             | 274.0437                                                         | 7 |
| 30 |                                    | Myricetin                                                                  | C <sub>15</sub> H <sub>10</sub> O <sub>8</sub>               | [M+H] <sup>+</sup> | 319.0448 | 319.0460 | 100  | -3.7                                                             | 153.0178; 273.0397                                               | 8 |
| 31 |                                    | Chlorogenic Acid                                                           | C <sub>16</sub> H <sub>18</sub> O <sub>9</sub>               | [M+H] <sup>+</sup> | 355.1024 | 355.1037 | 100  | -3.6                                                             | 163.0395                                                         | 3 |
| 32 |                                    | Quercetin 7-O-glucoside/Hyperin/<br>Isoquercetin/Quercetin 3'-O-glucoside* | C <sub>21</sub> H <sub>20</sub> O <sub>12</sub>              | [M+H] <sup>+</sup> | 465.1028 | 465.1043 | 100  | -3.2                                                             | 303.0506; 85.0288; 91.0395;<br>97.0289; 127.0396                 | 7 |
| 33 |                                    | Myricetin 3-O-glucoside/<br>Myricetin 3'-O-glucoside*                      | C <sub>21</sub> H <sub>20</sub> O <sub>13</sub>              | [M+H] <sup>+</sup> | 481.0977 | 481.0989 | 100  | -2.4                                                             |                                                                  | 3 |
| 34 | Unknown M1                         | C <sub>20</sub> H <sub>10</sub> N <sub>10</sub> O <sub>6</sub>             | [M+H] <sup>+</sup>                                           | 487.0858           | 487.0860 | 100      | -0.4 |                                                                  |                                                                  |   |
| 35 | Quercetin 3-O-(6-acetylglucoside)  | C <sub>23</sub> H <sub>22</sub> O <sub>13</sub>                            | [M+H] <sup>+</sup>                                           | 507.1133           | 507.1143 | 100      | -1.9 |                                                                  | 3                                                                |   |
| 36 | Quercetin 3-O-robinobioside/Rutin* | C <sub>27</sub> H <sub>30</sub> O <sub>16</sub>                            | [M+H] <sup>+</sup>                                           | 611.1607           | 611.1632 | 100      | -4.0 | 303.0506; 465.1040;<br>129.0552;<br>147.0679; 85.0288            | 8                                                                |   |
| 37 | Weak-polar                         | Unknown M2                                                                 | C <sub>44</sub> H <sub>38</sub> O <sub>24</sub>              | [M+H] <sup>+</sup> | 951.1826 | 951.1810 | 100  | 1.6                                                              |                                                                  |   |
| 38 |                                    | Linoleic acid                                                              | C <sub>18</sub> H <sub>32</sub> O <sub>2</sub>               | [M+H] <sup>+</sup> | 281.2475 | 281.2480 | 100  | -1.7                                                             | 263.2368; 245.2266;<br>83.0858;<br>97.1012; 111.1158             | 4 |
| 39 |                                    | Oleic Acid                                                                 | C <sub>18</sub> H <sub>34</sub> O <sub>2</sub>               | [M+H] <sup>+</sup> | 283.2632 | 283.2638 | 100  | -2.1                                                             | 265.2524; 247.2418; 135.1176                                     | 4 |
| 40 |                                    | Unknown W1                                                                 | C <sub>29</sub> H <sub>48</sub> O <sub>2</sub>               | [M+H] <sup>+</sup> | 429.3727 | 429.3735 | 100  | -1.8                                                             | 383.1036; 249.0393;<br>219.0265;<br>293.0720; 323.0828; 250.0470 |   |
| 41 | Tocopherol                         | C <sub>29</sub> H <sub>50</sub> O <sub>2</sub>                             | [M+H] <sup>+</sup>                                           | 431.3884           | 431.3872 | 100      | 2.7  | 165.0919                                                         | 9                                                                |   |
| 42 | Hibifolin                          | C <sub>21</sub> H <sub>18</sub> O <sub>14</sub>                            | [M+H] <sup>+</sup>                                           | 495.0769           | 495.0785 | 100      | -3.2 |                                                                  | 7                                                                |   |
| 43 | Unknown W2                         | C <sub>33</sub> H <sub>45</sub> NO <sub>4</sub>                            | [M+H] <sup>+</sup>                                           | 520.3421           | 520.3424 | 100      | -0.5 | 130.0864; 180.0870;<br>104.0706;<br>252.1077; 268.1034; 184.0731 |                                                                  |   |
| 44 | Unknown W3                         | C <sub>29</sub> H <sub>43</sub> N <sub>7</sub> O <sub>2</sub>              | [M+H] <sup>+</sup>                                           | 522.3551           | 522.3556 | 100      | -0.9 | 180.0868; 104.0707;<br>184.0736;<br>325.1127; 391.2841; 162.0765 |                                                                  |   |
| 45 | Lutein                             | C <sub>40</sub> H <sub>56</sub> O <sub>2</sub>                             | [M+H] <sup>+</sup>                                           | 569.4353           | 569.4364 | 100      | -1.9 | 476.3653; 175.1493                                               | 10                                                               |   |
| 46 | Unknown W4                         | C <sub>35</sub> H <sub>36</sub> N <sub>4</sub> O <sub>5</sub>              | [M+H] <sup>+</sup>                                           | 593.2758           | 593.2773 | 100      | -2.5 | 252.1081; 253.1114;<br>234.0970;<br>465.1023; 415.0985; 266.1238 |                                                                  |   |

|    |            |                      |           |          |          |     |      |                                                                  |
|----|------------|----------------------|-----------|----------|----------|-----|------|------------------------------------------------------------------|
| 47 | Unknown W5 | $C_{44}H_{77}N_3O_7$ | $[M+H]^+$ | 760.5816 | 760.5853 | 100 | -4.8 | 104.0707; 130.0867;<br>184.0734;<br>294.1550; 418.1551; 420.0900 |
| 49 | Unknown W6 | $C_{55}H_{74}N_4O_5$ | $[M+H]^+$ | 871.5732 | 871.5731 | 100 | 0.1  |                                                                  |

80      \*: Isobaric compounds

81 **Part4:**82 **Table S2** Putative identification of chemical constituents of *A. manihot* flower extracts

83 by HPLC-MS/MS in positive ion mode.

| Peak NO. | Analyte                                  | t <sub>R</sub> (min) | Formula                                                       | [M+H] <sup>+</sup> (m/z) | Fragment ions (m/z)               | Ref |
|----------|------------------------------------------|----------------------|---------------------------------------------------------------|--------------------------|-----------------------------------|-----|
| 1        | 5-(hydroxymethyl)-2-furancarboxylic acid | 2.70                 | C <sub>6</sub> H <sub>6</sub> O <sub>4</sub>                  | 143.0                    | 99.0                              | 3   |
| 2        | Serine                                   | 3.20                 | C <sub>3</sub> H <sub>7</sub> NO <sub>3</sub>                 | 106.0                    | 88.0,60                           | 1,3 |
| 3        | γ-Aminobutyric acid                      | 3.22                 | C <sub>4</sub> H <sub>9</sub> NO <sub>2</sub>                 | 104.1                    | 86.0,87.0                         | 1   |
| 4        | Adenosine                                | 3.32                 | C <sub>10</sub> H <sub>13</sub> N <sub>5</sub> O <sub>4</sub> | 268.1                    | 136.1                             | 3   |
| 5        | 2'-Deoxyadenosine                        | 3.32                 | C <sub>10</sub> H <sub>13</sub> N <sub>5</sub> O <sub>3</sub> | 252.1                    | 99.0,136.1,117.1                  | 2   |
| 6        | Glucose                                  | 3.37                 | C <sub>6</sub> H <sub>12</sub> O <sub>6</sub>                 | 203.0                    |                                   | 11  |
| 7        | Valine                                   | 3.42                 | C <sub>5</sub> H <sub>11</sub> NO <sub>2</sub>                | 118.1                    | 72.1                              | 1,3 |
| 8        | Proline                                  | 3.61                 | C <sub>5</sub> H <sub>9</sub> NO <sub>2</sub>                 | 116.1                    | 70.0                              | 1,3 |
| 9        | Unknown 1                                | 3.87                 |                                                               | 260.0                    |                                   |     |
| 10       | Phenylalanine                            | 4.01                 | C <sub>9</sub> H <sub>11</sub> NO <sub>2</sub>                | 166.1                    | 120.1                             | 1,3 |
| 11       | Cytidine                                 | 4.08                 | C <sub>9</sub> H <sub>13</sub> N <sub>3</sub> O <sub>5</sub>  | 244.1                    | 112.1                             | 2   |
| 12       | Unknown 2                                | 5.30                 |                                                               | 130.0                    |                                   |     |
| 13       | Unknown 3                                | 5.78                 |                                                               | 348.0                    |                                   |     |
| 14       | Unknown 4                                | 6.42                 |                                                               | 238.1                    |                                   |     |
| 15       | Leucine                                  | 9.06                 | C <sub>6</sub> H <sub>13</sub> NO <sub>2</sub>                | 132.1                    | 86.1                              | 1,3 |
| 16       | Unknown 5                                | 15.28                |                                                               | 120.0                    |                                   |     |
| 17       | Unknown 6                                | 25.44                |                                                               | 298.0                    |                                   |     |
| 18       | Unknown 7                                | 38.01                |                                                               | 371.1                    |                                   |     |
| 19       | Unknown 8                                | 39.15                |                                                               | 657.0                    |                                   |     |
| 20       | Unknown 9                                | 40.00                |                                                               | 479.0                    |                                   |     |
| 21       | Unknown 10                               | 41.98                |                                                               | 476.1                    |                                   |     |
| 22       | Unknown 11                               | 43.42                |                                                               | 402.0                    |                                   |     |
| 23       | Unknown 12                               | 43.96                |                                                               | 520.1                    |                                   |     |
| 24       | Myricetin 3-O-glucoside                  | 44.47                | C <sub>21</sub> H <sub>20</sub> O <sub>13</sub>               | 481.1                    | 318.0                             | 3   |
| 25       | Lutein                                   | 45.80                | C <sub>40</sub> H <sub>56</sub> O <sub>2</sub>                | 569.4                    | 175.1,476.3                       | 10  |
| 26       | Quercetin 3-O-robinobioside              | 47.23                | C <sub>27</sub> H <sub>30</sub> O <sub>16</sub>               | 611.0                    | 303.0,465.0,129.1                 | 3   |
| 27       | Quercetin 7-O-glucoside                  | 47.24                | C <sub>21</sub> H <sub>20</sub> O <sub>12</sub>               | 465.0                    | 303.1,465.0                       | 3   |
| 28       | Rutin                                    | 47.63                | C <sub>27</sub> H <sub>30</sub> O <sub>16</sub>               | 611.0                    | 85.0,129.1,147.1<br>303.1,465.1   | 3,7 |
| 29       | Hyperin                                  | 48.85                | C <sub>21</sub> H <sub>20</sub> O <sub>12</sub>               | 465.0                    | 303.0,273.1,257.0,<br>181.0,153.1 | 3,7 |
| 30       | Isoquercetin                             | 49.53                | C <sub>21</sub> H <sub>20</sub> O <sub>12</sub>               | 465.0                    | 303.0,273.1,257.1<br>181.0,153.0  | 3,7 |
| 31       | Myricetin 3'-O-glucoside                 | 50.59                | C <sub>21</sub> H <sub>20</sub> O <sub>13</sub>               | 481.1                    | 319.1                             | 3   |
| 32       | Unknown 13                               | 52.28                |                                                               | 551.0                    |                                   |     |
| 33       | Hibifolin                                | 54.79                | C <sub>21</sub> H <sub>18</sub> O <sub>14</sub>               | 495.1                    | 319.0                             | 3,7 |
| 34       | Tocopherol                               | 58.36                | C <sub>29</sub> H <sub>50</sub> O <sub>2</sub>                | 431.3                    | 165.1                             | 9   |
| 35       | Myricetin                                | 58.37                | C <sub>15</sub> H <sub>10</sub> O <sub>8</sub>                | 319.0                    | 153.0,273.0,181.1                 | 7   |
| 36       | Quercetin 3'-O-glucoside                 | 58.70                | C <sub>21</sub> H <sub>20</sub> O <sub>12</sub>               | 465.0                    | 85.0,91.0,97.0,303.1,<br>127.0    | 3,7 |

|    |               |       |                                                              |       |                                 |   |
|----|---------------|-------|--------------------------------------------------------------|-------|---------------------------------|---|
| 37 | Unknown 14    | 61.73 |                                                              | 551.0 |                                 |   |
| 38 | Quercetin     | 64.84 | C <sub>15</sub> H <sub>10</sub> O <sub>7</sub>               | 303.0 | 274.0,153.1                     | 7 |
| 39 | Unknown 15    | 65.75 |                                                              | 219.1 |                                 |   |
| 40 | Unknown 16    | 67.14 |                                                              | 274.2 |                                 |   |
| 41 | Unknown 17    | 68.09 |                                                              | 343.1 |                                 |   |
| 42 | Uridine       | 68.48 | C <sub>9</sub> H <sub>12</sub> N <sub>2</sub> O <sub>6</sub> | 245.1 | 113.0                           | 6 |
| 43 | Linoleic acid | 69.09 | C <sub>18</sub> H <sub>32</sub> O <sub>2</sub>               | 281.2 | 83.1,97.1,111.1,<br>245.2,263.2 | 4 |
| 44 | Oleic Acid    | 69.39 | C <sub>18</sub> H <sub>34</sub> O <sub>2</sub>               | 283.2 | 135.1,247.2,265.2               | 4 |

84

85

86 **Part5:**

87 **References**

- 88 1 L. Y. Du, D. W. Qian, S. Jiang, J. M. Guo, S. L. Su and J. A. Duan, *Anal. Methods*,  
89 2015, **7**, 10280–10290.
- 90 2 L. Y. Du, D. W. Qian, S. Jiang, E. X. Shang, J. M. Guo, P. Liu, S. L. Su, J. A.  
91 Duan and M. Zhao, *J. Chromatogr. B Anal. Technol. Biomed. Life Sci.*, 2015,  
92 **1006**, 130–137.
- 93 3 S. Yin, Y. Mei, L. Wei, L. Zou, Z. Cai, N. Wu, J. Yuan, X. Liu, H. Ge, D. Wang  
94 and D. Wang, *Molecules*, 2021, **26**, 1864.
- 95 4 F. Luan, Q. Wu, Y. Yang, H. Lv, D. Liu, Z. Gan and N. Zeng, *Front. Pharmacol.*,  
96 2020, **11**, 1068.
- 97 5 X. Wang, Y. Wang, M. Wu and X. Zhang, *Russ. J. Phys. Chem. A*, 2012, **86**,  
98 1469–1472.
- 99 6 D. Zhou, J. Zeng, Q. Fu, D. Gao, K. Zhang, X. Ren, K. Zhou, Z. Xia and L. Wang,  
100 *J. Chromatogr. A*, 2018, **1571**, 165–175.
- 101 7 J. Guo, C. Xue, J. A. Duan, D. Qian, Y. Tang and Y. You, *Phytomedicine*, 2011,  
102 **18**, 1250–1254.
- 103 8 J. Li, J. Zhang and M. Wang, *Molecules*, 2016, **21**, 810.
- 104 9 M. Taroreh, S. Raharjo, P. Hastuti and A. Murdiati, *Agric. Agric. Sci. Procedia*,  
105 2016, **9**, 271–278.
- 106 10 C. Puel, J. Mathey, S. Kati-Coulibaly, M. J. Davicco, P. Lebecque, B.  
107 Chanteranne, M. N. Horcajada and V. Coxam, *J. Ethnopharmacol.*, 2005, **99**,

108 55–60.

109 11 X. X. Pan, J. H. Tao, S. Jiang, Y. Zhu, D. W. Qian and J. A. Duan, *Int. J. Biol.*

110 *Macromol.*, 2018, **107**, 9–16.

111
